# Supplementary material for: Loss of IκB kinase β promotes myofibroblast transformation and senescence through activation of the ROS-TGFβ autocrine loop
Source: Protein Cell. 2016 Mar 5;7(5):338–50. doi: 10.1007/s13238-015-0241-6 (PMC4853320; doi:10.1007/s13238-015-0241-6)

**Table S1. Primer sequences**

| Primers for quantitative PCR |                                      |
|------------------------------|--------------------------------------|
| <i>Tgfβ1</i> Forward         | 5'-AACCGCACTGTCATTACACC -3'          |
| <i>Tgfβ1</i> Reverse         | 5'-CGCCAAACTTCTCCA AACC -3'          |
| <i>Tgfβ2</i> Forward         | 5'-CTCAACACACCAAAGTCCTC -3'          |
| <i>Tgfβ2</i> Reverse         | 5'-ATCAAAACTCCCTCCCTCC -3'           |
| <i>Tgfβ3</i> Forward         | 5'-ACCAAAGCGACAGACCTCAC -3'          |
| <i>Tgfβ3</i> Reverse         | 5'-TTCCCCTAACCAACCCACAC -3'          |
| <i>Tgfβr1</i> Forward        | 5'-AACCGCACTGTCATTACACC -3'          |
| <i>Tgfβr1</i> Reverse        | 5'-CGCCAAACTTCTCCA AACC -3'          |
| <i>Tgfβr2</i> Forward        | 5'-AAGGAA AAGAAAAGGGCGG -3'          |
| <i>Tgfβr2</i> Reverse        | 5'-GCACACGGTAGCAGTAGA AG -3'         |
| <i>Thbs1</i> Forward         | 5'-TGCCCCAAAGGGAGAAAGTCCAGAA -3'     |
| <i>Thbs1</i> Reverse         | 5'-CTGAGCAGCACACACAGAAGCATT -3'      |
| <i>Acta2</i> Forward         | 5'-TTGCTGACAGGATGCAGAAGGAGA -3'      |
| <i>Acta2</i> Reverse         | 5'-TCACAGTTGTGTGCTAGAGGCAGA -3'      |
| <i>Cnn1</i> Forward          | 5'-TTGTGGATGTGACAGCAGCGTTTG -3'      |
| <i>Cnn1</i> Reverse          | 5'-TGTATCACATGGCCTGTGTGTGGA -3'      |
| <i>D0H4S114</i> Forward      | 5'-AGGCCTTGTTCTGAACTGTTTGCG -3'      |
| <i>D0H4S114</i> Reverse      | 5'-GCAGCGCACACTGCAATTCTACAT -3'      |
| <i>Smad6</i> Forward         | 5'-ACCGGGTTACTCCATCAAGGTGTT -3'      |
| <i>Smad6</i> Reverse         | 5'-GCCGCATTGCTATCTGTGGTTGTT -3'      |
| <i>Ctgf</i> Forward          | 5'-GACAGCTTGTGGCAAGTGAA -3'          |
| <i>Ctgf</i> Reverse          | 5'-TTCCTCGTGGAAATCTGACC -3'          |
| <i>Hmox1</i> Forward         | 5'-AGGTGATGCTGACAGAGGAACACA -3'      |
| <i>Hmox1</i> Reverse         | 5'-ACAGAGAGAAGGCCACATTGGACA -3'      |
| <i>p21</i> Forward           | 5'-TTGTCGCTGTCTTGCACTC-3'            |
| <i>p21</i> Reverse           | 5'-AGGTTTGGAGACTGGGAGAG-3'           |
| <i>Fn1</i> Forward           | 5'-TTTTGACAACGGGAAGCATTATCAGATAA -3' |
| <i>Fn1</i> Reverse           | 5'-TGATCAAAACATTTCTCAGCTATTGG -3'    |
| <i>Ccl2</i> Forward          | 5'-TCACCTGCTGCTACTCATTACCA -3'       |
| <i>Ccl2</i> Reverse          | 5'-AAAGGTGCTGAAGACCTTAGGGCA -3'      |
| <i>Ccl7</i> Forward          | 5'-CCCAATGCATCCACATGCTGCTAT -3'      |
| <i>Ccl7</i> Reverse          | 5'-TGCTTCTTGGCTCCTAGGTTGGTT -3'      |
| <i>Il-6</i> Forward          | 5'-ACCACTTCACAAGTCGGAGGCTTA -3'      |
| <i>Il-6</i> Reverse          | 5'-TGGTACTCCAGAAGACCAGAGGAA -3'      |
| <i>IκBα</i> Forward          | 5'-ATCCTGACCTGGTTTCGCTCTTGT -3'      |
| <i>IκBα</i> Reverse          | 5'-ACACAGTCATCATAGGGCAGCTCA -3'      |
| <i>RelB</i> Forward          | 5'-GCGGATTTGCCGAATCAACAAGGA -3'      |
| <i>RelB</i> Reverse          | 5'-AACACATTGACAGTCACGGGCTCT -3'      |
| <i>Mt1</i> Forward           | 5'-AGCTTCACCAGATCTCGGAATGGA -3'      |
| <i>Mt1</i> Reverse           | 5'-ACGCTGGGTTGGTCCGATACTATT -3'      |
| <i>Mt2</i> Forward           | 5'-TGGCCATATCCCTTGAGCCAGAAA -3'      |
| <i>Mt2</i> Reverse           | 5'-TTGTGCGAAGCCTCTTTGCAGATG -3'      |
| <i>Sod1</i> Forward          | 5'-TGGCGATGAAAGCGGTGTGC -3'          |

|                      |                             |
|----------------------|-----------------------------|
| <i>Sod1</i> Reverse  | 5'-GCGGCTCCCAGCATTTCAG -3'  |
| <i>Sod2</i> Forward  | 5'-GCACATTAACGCGCAGATCA -3' |
| <i>Sod2</i> Reverse  | 5'-AGCCTCCAGCAACTCTCCTT -3' |
| <i>Gapdh</i> Forward | 5'-AACGACCCCTTCATTGACC -3'  |
| <i>Gapdh</i> Reverse | 5'-TGAAGACACCAGTAGACTCC -3' |
| <i>Nox1</i> Forward  | 5'-TGGATGGATCTCTCGCTTCT-3'  |
| <i>Nox1</i> Reverse  | 5'-TCACCCAAGCTCTCCTCTGT-3'  |
| <i>Nox2</i> Forward  | 5'-CTTTCTCAGGGGTTCAGTG-3'   |
| <i>Nox2</i> Reverse  | 5'-TGCAGTCTATCATCCAAGC-3'   |
| <i>Nox4</i> Forward  | 5'-CCAGAATGAGGATCCCAGAA-3'  |
| <i>Nox4</i> Reverse  | 5'-CAGCAGCAGCATGTAGAAGAC-3' |
| <i>Rac1</i> Forward  | 5'-TATGGGACACAGCTGGACAA-3'  |
| <i>Rac1</i> Reverse  | 5'-TTGAGTCCTCGCTGTGTGAC-3'  |
| <i>Rac2</i> Forward  | 5'-CATCAGCTACACCACCAACG-3'  |
| <i>Rac2</i> Reverse  | 5'-TCTCGATGGTGTCTTGTCA-3'   |

#### Primers used in CHIP

|                                            |                                  |
|--------------------------------------------|----------------------------------|
| <i>Tgfβ2</i> promoter -1143 - -813 Forward | 5'- CTGCAACAACAGACCTCACTTCCT -3' |
| <i>Tgfβ2</i> promoter -1143 - -813 Reverse | 5'- TCTTTCTTCCCACTGGTCTTTCCC -3' |
| <i>Tgfβ2</i> promoter -870 - -370 Forward  | 5'- TCGTGGCCACAGAGTCATCACTAA -3' |
| <i>Tgfβ2</i> promoter -870 - -370 Reverse  | 5'- ACACACACACACACACACACAC -3'   |
| <i>Tgfβ2</i> promoter -189 - 94 Forward    | 5'- ACTGCAAATTCCTCATGCCAGTCG -3' |
| <i>Tgfβ2</i> promoter -189 - 94 Reverse    | 5'- TCTCAGCGCCTTCTCTCTTTCTCT -3' |
| <i>Mt1</i> promoter -183 - 168 Forward     | 5'- TGGGTTTACGGAGATAGCTGGCTT -3' |
| <i>Mt1</i> promoter -183 - 168 Reverse     | 5'- ACGTTGAAGTCGTGGTGACGCTTA -3' |
| <i>Sod2</i> promoter -236 - 1 Forward      | 5'- AATTCTGACCAGCAGCAGAGCCTT -3' |
| <i>Sod2</i> promoter -236 - 1 Reverse      | 5'- TGTGCCAAATTGGTAGAGGCCG -3'   |
| <i>Sod2</i> intron 2161 - 2498 Forward     | 5'- TGTGGTTGCTGGACCTTTGGAAGA -3' |
| <i>Sod2</i> intron 2161 - 2498 Reverse     | 5'- AGGAAATGCTTTCCCAACTGGGCT -3' |

#### Primers used for bisulfite sequencing

|                         |                                     |
|-------------------------|-------------------------------------|
| <i>Tgfβ2</i> BS Forward | 5'- AAGAGTTATTTTGGAGTAATTTATTTG -3' |
| <i>Tgfβ2</i> BS Forward | 5'- ACTACCTACAAAAAAACCAACCTC -3'    |

#### Primers used for measurements of mouse telomere

|                  |                                                |
|------------------|------------------------------------------------|
| Mouse telomere F | 5'-CGGTTTGTGTTGGGTTTGGGTTTGGGTTTGGGTTTGGGTT-3' |
| Mouse telomere R | 5'-GGCTTGCCCTTACCCTTACCCTTACCCTTACCCTTACCCT-3' |
| Mouse 36B4 F     | 5'-ACTGGTCTAGGACCCGAGAAG-3'                    |
| Mouse 36B4 R     | 5'-TCAATGGTGCCTCTGGAGATT-3'                    |

---

**Figure S1. Up-regulation of TGF $\beta$ -target genes in the IKK $\beta$ -null cells.** RNA isolated from wild type and *Ikk $\beta$ <sup>-/-</sup>* cells were examined by real-time qRT-PCR for expression of genes of the TGF $\beta$  pathway. Fold change over uninfected cells was calculated based on data from biological triplicates. Results represent the mean values  $\pm$  SD from at least two independent experiments. \*\*p<0.01 and \*\*\* p<0.001 was considered significant.

**Figure S2. Induction of IKK $\beta$  loss *in vitro*.** The *Ikk $\beta$ <sup>F/F</sup>* fibroblasts were infected with Ad-GFP and Ad-Cre with or without co-infection with Ad-IKK $\beta$  for 48 h. (A) The infected cells were photographed under light and fluorescence microscopy. More than 90% *Ikk $\beta$ <sup>F/F</sup>*/Ad-GFP cells were shown to be GFP positive. (B) The *Ikk $\beta$ <sup>F/F</sup>*, *Ikk $\beta$ <sup>F/F</sup>*/Ad-Cre (infected for 48 h) and *Ikk $\beta$ <sup>-/-</sup>* cells were treated with TNF $\alpha$  for various times; cell lysates were analyzed by Western blotting for IKK $\beta$ , I $\kappa$ B $\alpha$  and  $\beta$ -actin. The un-infected or infected *Ikk $\beta$ <sup>F/F</sup>* cells were used for (C) RNA isolation and analyzed by real-time RT-PCR for *Ikk $\beta$*  expression, and (D) transfection with  $\kappa$ B-Luc reporter and  $\beta$ -gal expression plasmid. The Luc and  $\beta$ -gal activities were examined 24 h after transfection, and the relative Luc activity (versus  $\beta$ -gal activity) was calculated. Fold change over uninfected cells was calculated based on data from biological triplicates. (E) After Ad-Cre infection, the *Ikk $\beta$ <sup>F/F</sup>*/Ad-Cre cells were passage *in vitro* for various lengths of time and without or with IKK $\beta$  re-expression (Ad-IKK $\beta$  infection). RNA was isolated and analyzed by real-time RT-PCR for the expression of NF- $\kappa$ B-target genes. Results represent the mean values  $\pm$  SD from at least two independent experiments. \*\*\* p<0.001 was considered significant.

**Figure S3. Genotyping of *Ikk $\beta$ <sup>F/F</sup>/Tgfb $\beta$ r2<sup>F/F</sup>*/Ad-GFP and *Ikk $\beta$ <sup>F/F</sup>/Tgfb $\beta$ r2<sup>F/F</sup>*/Ad-Cre fibroblasts.** Genomic DNAs were used for PCR genotyping, using primers recognizing the *Ikk $\beta$ <sup>F</sup>*, *Ikk $\beta$ <sup>A</sup>*, *Tgfb $\beta$ r2<sup>F</sup>* and *Tgfb $\beta$ r2<sup>A</sup>* alleles, and primers for *Gapdh*. The PCR products were examined on agarose gel after electrophoresis.

**Figure S4. Induction of IKK $\beta$  loss leads to progressive ROS elevation.** (A) The wild type cells with and without H<sub>2</sub>O<sub>2</sub> (100  $\mu$ M) treatment for 6 h and the *Ikk $\beta$* <sup>-/-</sup> cells with or without Ad-IKK $\beta$  infection for 24 h, and (B) the *Ikk $\beta$* <sup>F/F</sup> cells with or without Ad-Cre infection, were labeled with CM-H<sub>2</sub>DCFDA and analyzed by flow cytometry at 485/530 nm. y axis, cell numbers, x axis, fluorescence intensity. (C) The cells were divided to two groups based on the level of DCF intensity: the DCF-high (M2) and DCF-low (M1). The percentage of cells in each group was calculated. Results represent the mean values  $\pm$  SD from at least two independent experiments. \*: p<0.05 was considered significant.

**Figure S5. Increased TGF $\beta$  target gene expression and migration of the p65-null cells.** (A) RNA isolated from wild type and *p65*<sup>-/-</sup> fibroblasts were analyzed by RT-PCR for selected genes of the TGF $\beta$  pathways. (B) The cells were subjected to *in vitro* wound healing assays, and healing rate was calculated by comparison of the wound sizes at 0 and 12 h of wounding. Results represent the mean values  $\pm$  SD from at least two independent experiments. \*\*\*: p <0.001 were considered significant.

**Figure S6. IKK $\beta$  loss induces c-Jun binding and H3K4Me3 modification of the *Tgfb2* promoter** (A) Illustration of approximate locations of potential AP-1 binding sites in the *Tgfb2* promoter. The *Ikk $\beta$* <sup>F/F</sup> and *Ikk $\beta$* <sup>F/F</sup>/Ad-Cre cells were subjected to Chromatin-immunoprecipitation (ChIP) assay using antibodies for (B) transcription factors, p65, p50, Nrf2 and c-Jun, and (C) histone markers, H3K27Me3, H3K9Me2 and H3K4Me3. The precipitates were examined by PCR using primers for various regions of the *Tgfb2* promoter. The data were calculated as percentage of input and represented the mean values  $\pm$  SD from at least two independent experiments. \*\*\* p <0.001 were considered significant.

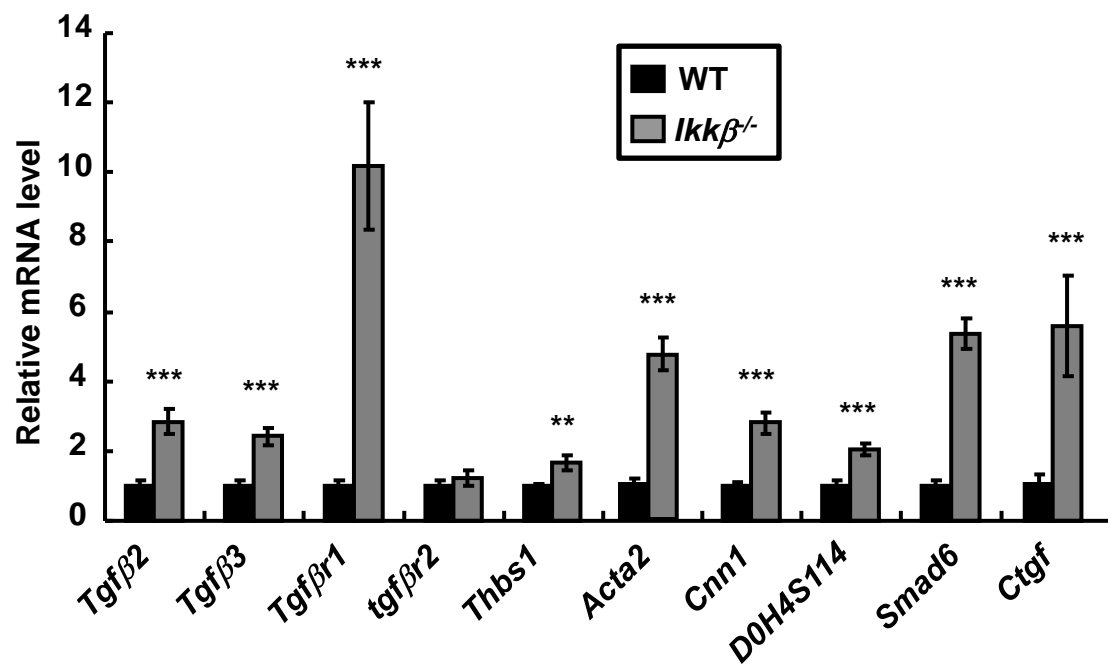

Chen, et. al. Supplemental Figure 1

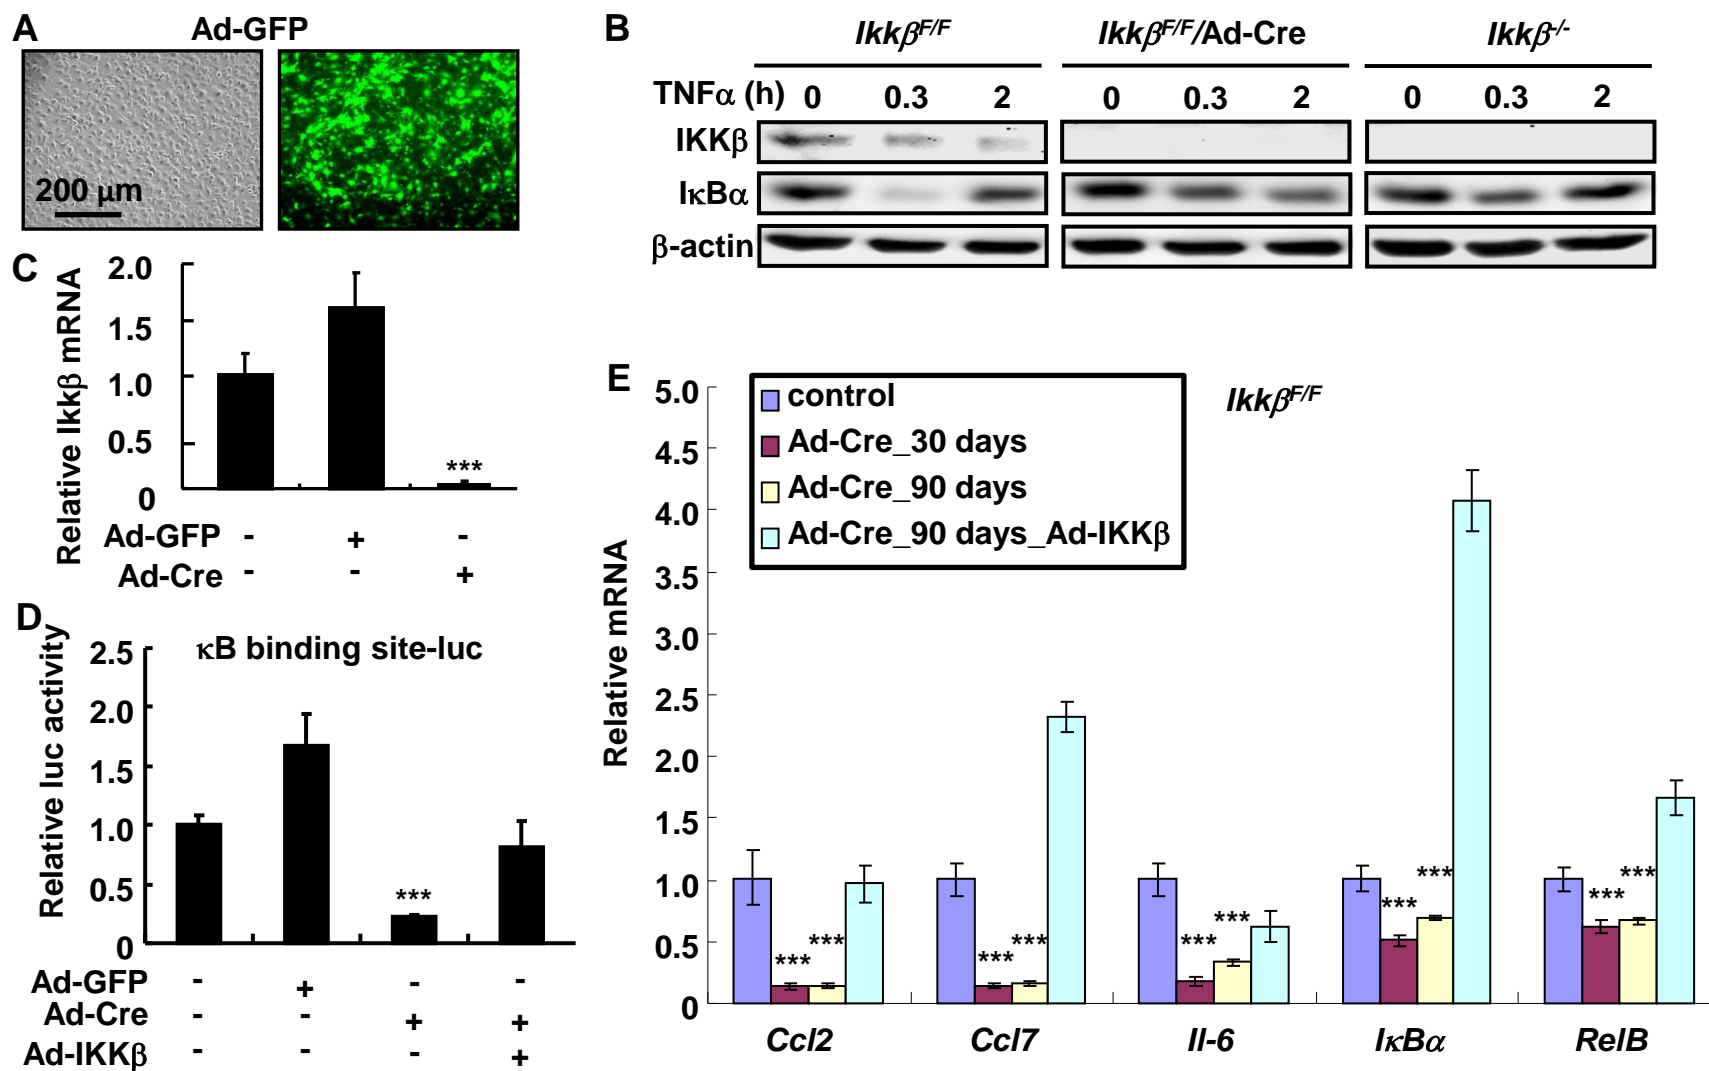

Chen, et. al. Supplemental Figure 2

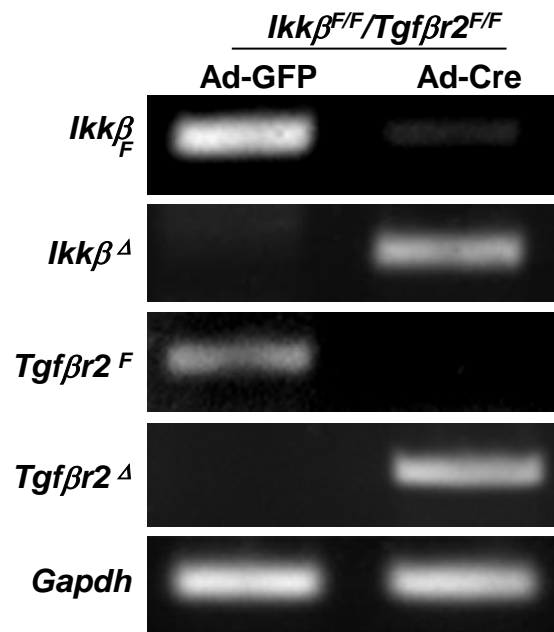

Chen, et. al. Supplemental Figure 3

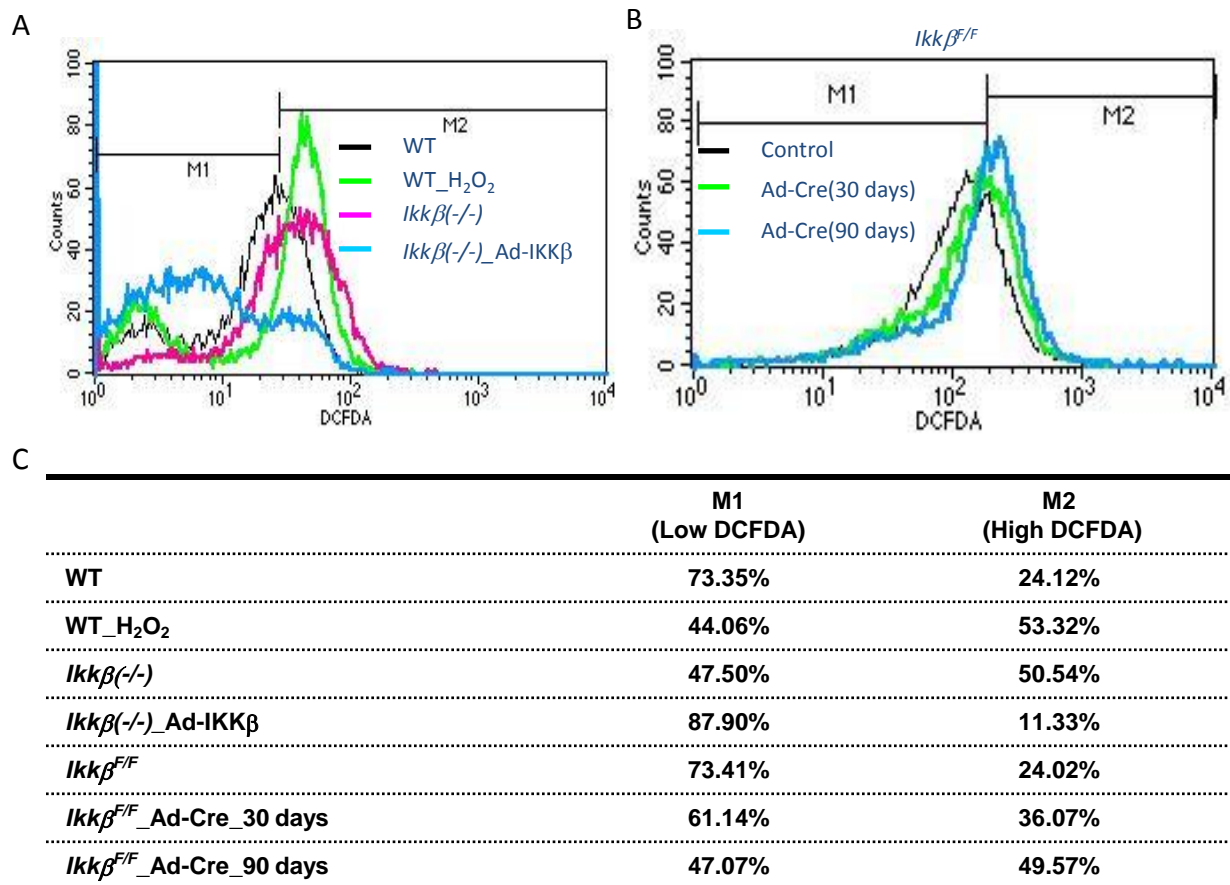

Chen, et. al., Supplemental Figure 4

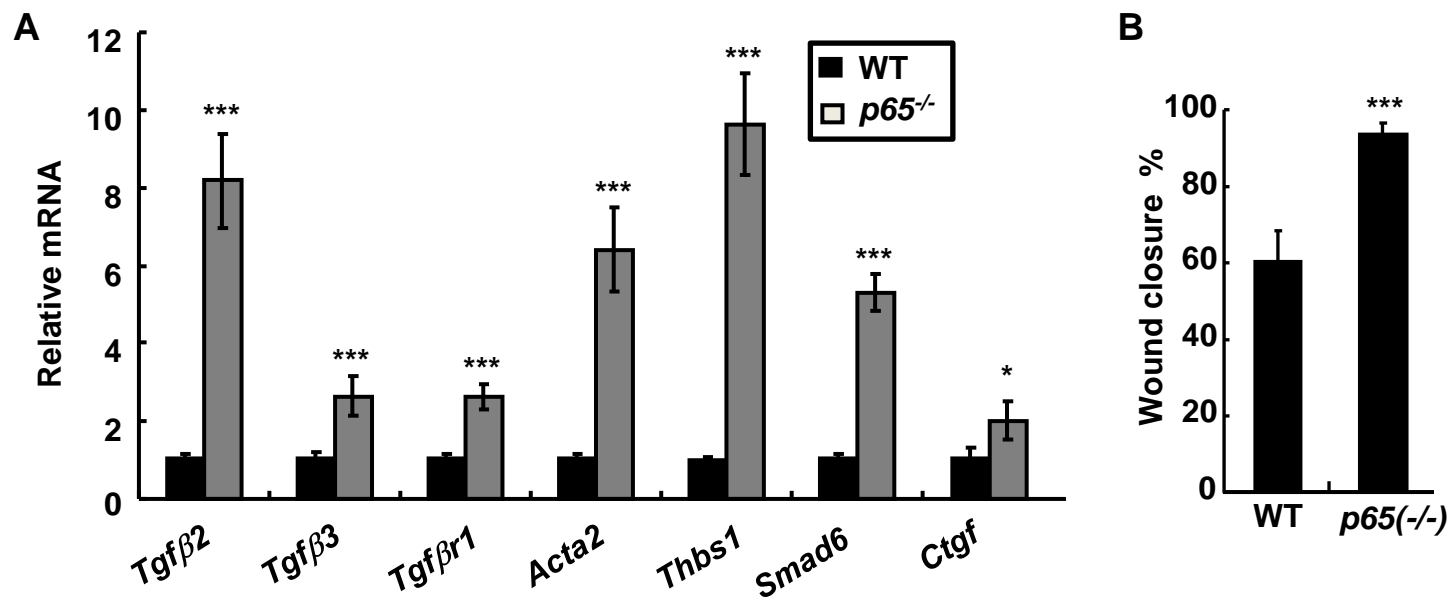

Chen, et. al., Supplemental Figure 5

A

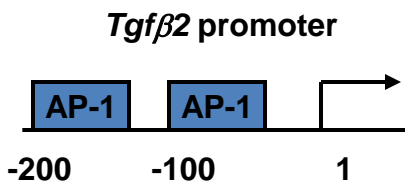

B

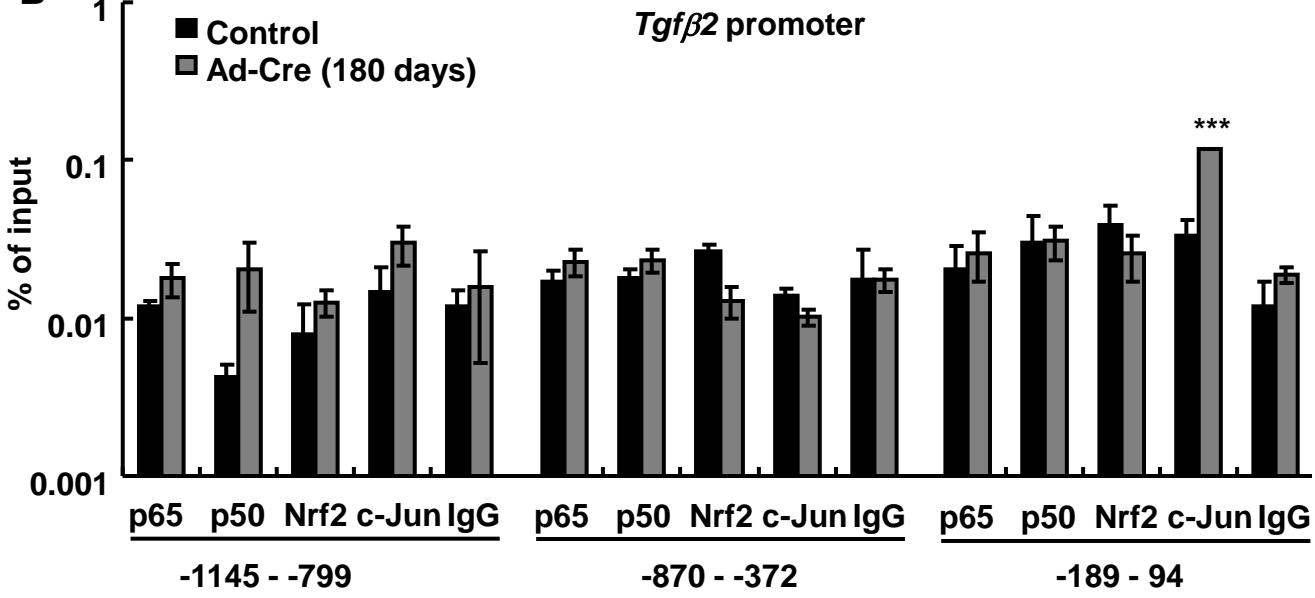

C

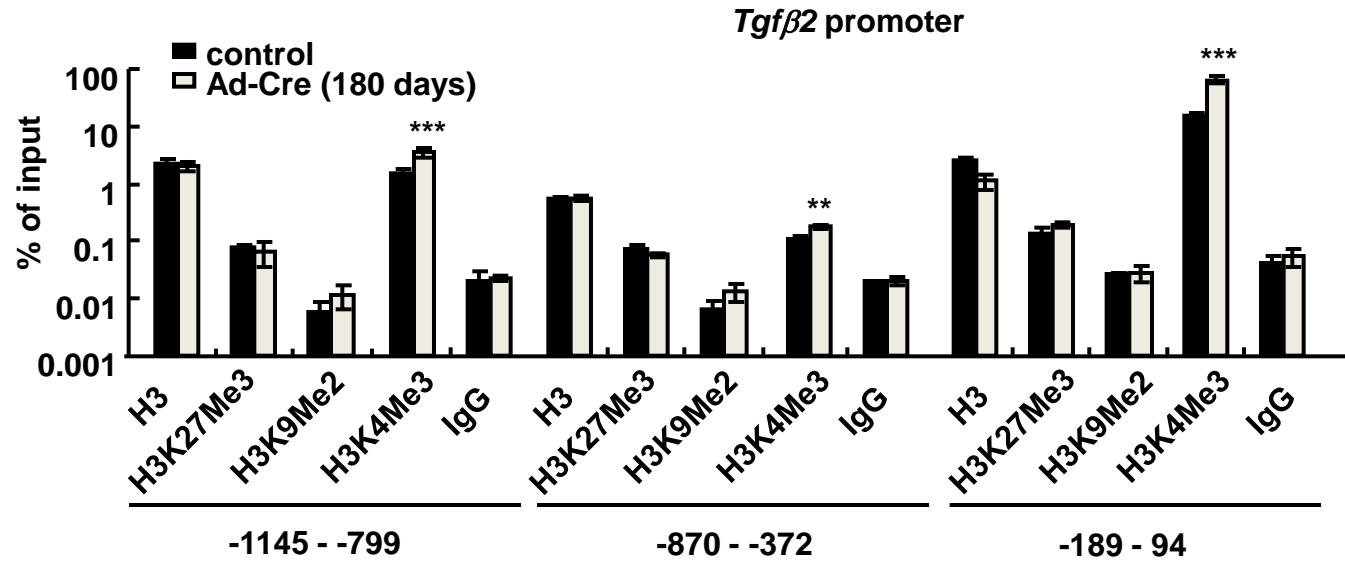

Supplement: Supplementary file 1 — Supplementary material 1 (PDF 772 kb) [file 13238_2015_241_MOESM1_ESM.pdf]
